# Supplementary material for: Nanocrystals of divalent europium-doped CsPbCl3 perovskites: a novel optoelectronic material with dual-emissions
Source: Royal Society of Chemistry journal article supplement (doi:10.1039/d3tc04288j), 2023-12-13
Supplement: d3tc04288j1.pdf [file d3tc04288j1.pdf]

## Electronic Supplementary Information

### **Nanocrystals of Divalent Europium-Doped CsPbCl<sub>3</sub> Perovskite: A Novel Optoelectronic Material with Dual-Emissions**

He Yuan <sup>1</sup>, Shilin Jin<sup>1</sup>, Song Zheng <sup>1</sup>, Rong Xie <sup>1</sup>, Tao Pang <sup>2</sup>, Bin Zhuang <sup>1</sup>, Feng  
Huang <sup>1</sup>, Daqin Chen <sup>1,3,4,\*</sup>

<sup>1</sup>College of Physics and Energy, Fujian Normal University, Fuzhou, Fujian 350117, P.  
R. China

E-mail: [dqchen@fjnu.edu.cn](mailto:dqchen@fjnu.edu.cn) (D. Q. Chen)

<sup>2</sup>Huzhou Key Laboratory of Materials for Energy Conversion and Storage, College of  
Science, Huzhou University, Zhejiang, Huzhou 313000, P. R. China

<sup>3</sup>Fujian Provincial Collaborative Innovation Center for Advanced High-Field  
Superconducting Materials and Engineering, Fuzhou, Fujian 350117, P. R. China

<sup>4</sup>Fujian Provincial Engineering Technology Research Center of Solar Energy  
Conversion and Energy Storage, Fuzhou, Fujian 350117, P. R. China

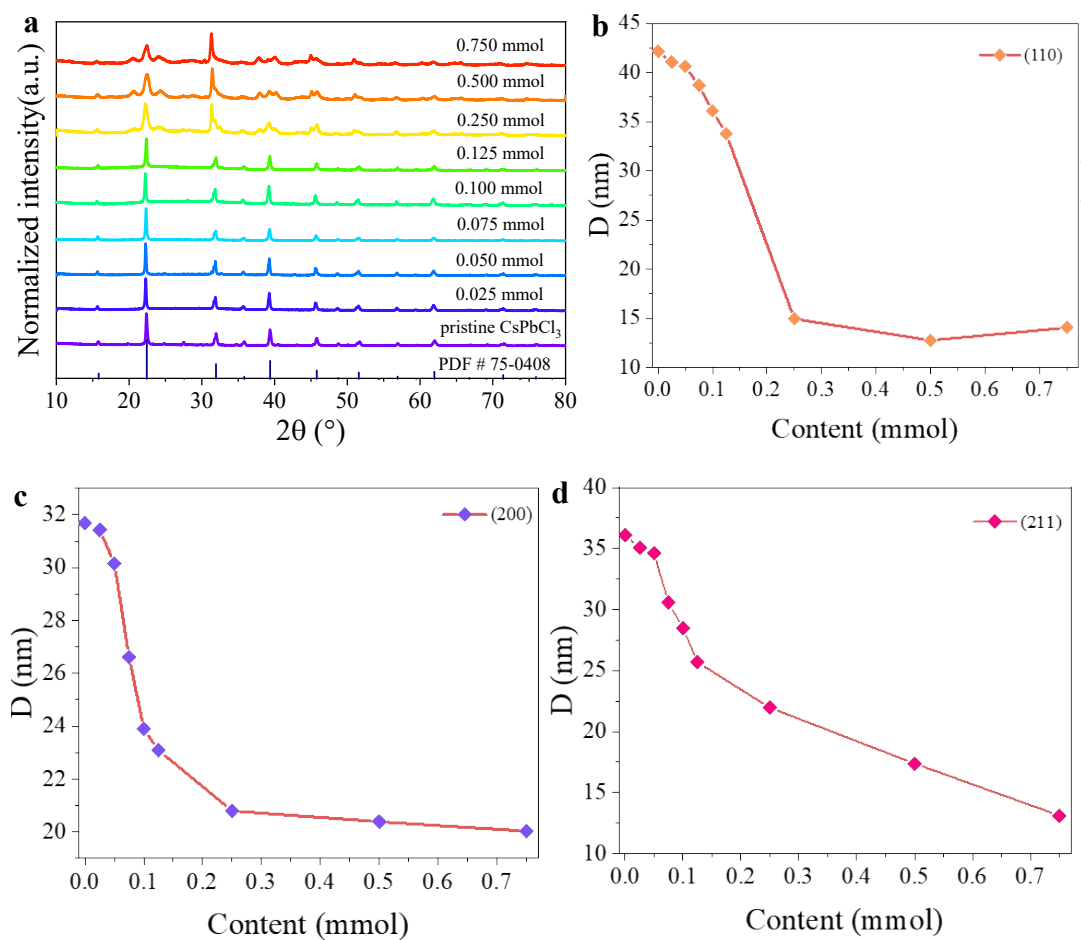

**Figure S1 (a)** XRD patterns of Eu: CsPbCl<sub>3</sub> samples prepared with different Eu doping concentrations. **(b-d)** Crystallite sizes evaluated from XRD results using the Scherrer equation for different crystalline planes.

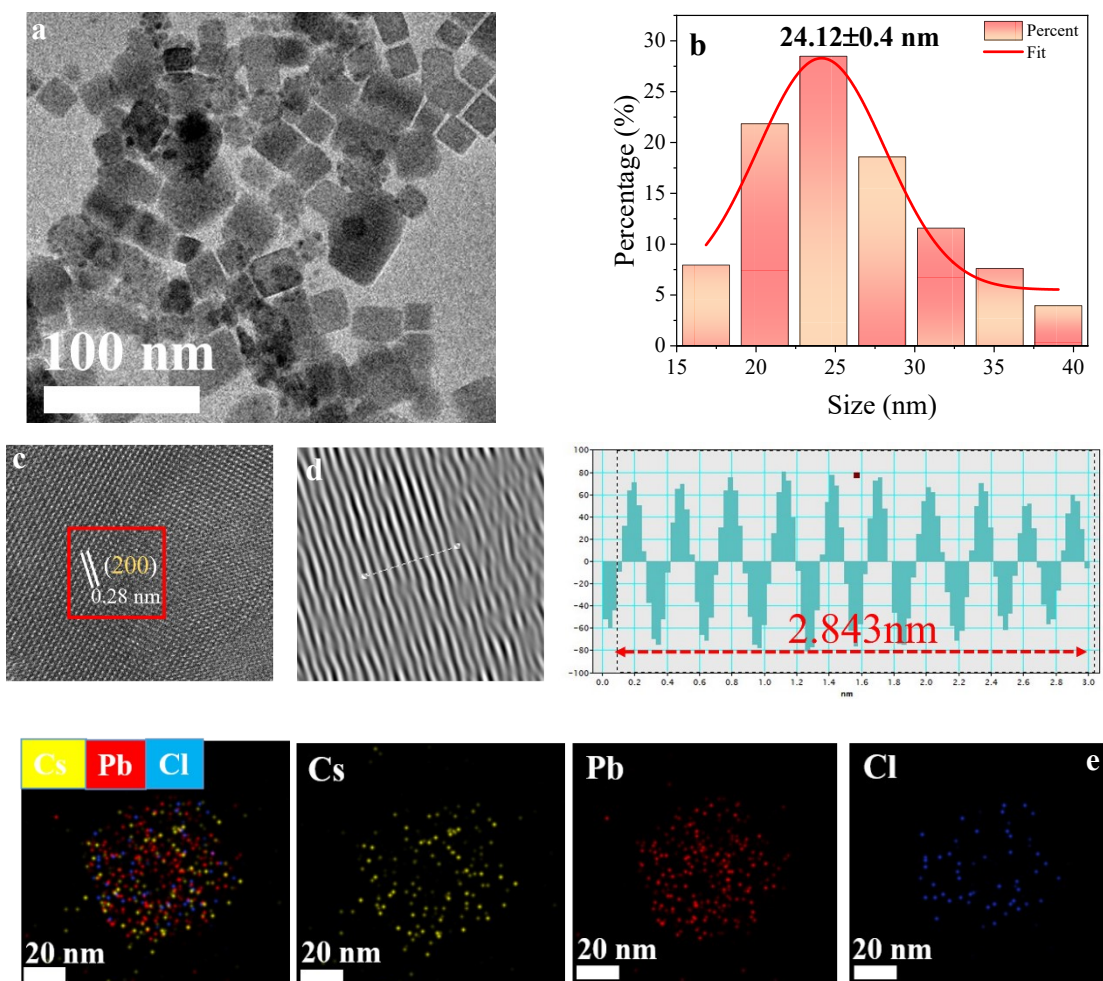

**Figure S2** (a) TEM image and (b) size distribution of the pristine CsPbCl<sub>3</sub> PeNCs. (c) HRTEM micrograph and (d) the corresponding FFT image showing atomic lattice fringes. (e) EDX mapping of the pristine CsPbCl<sub>3</sub> PeNCs.

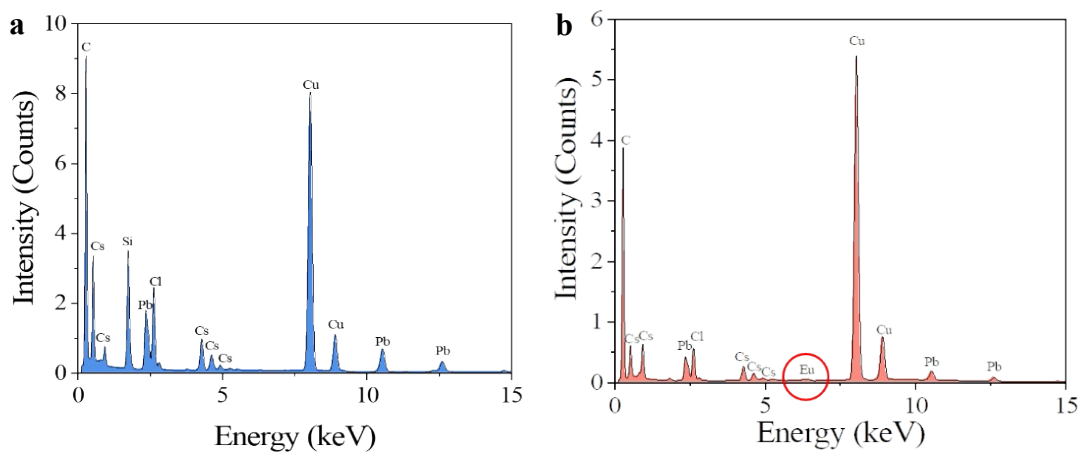

**Figure S3** Typical EDX analyses of (a) the undoped and (b) Eu-doped CsPbCl<sub>3</sub> (red circle represents the presence of Eu element).

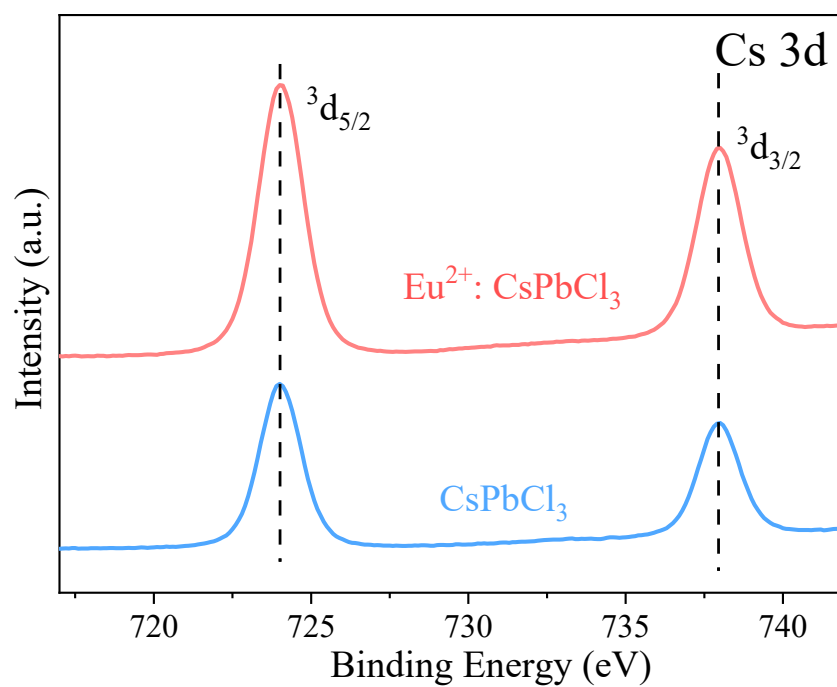

**Figure S4** HRXPS profiles of Cs ( $3d_{3/2}$ ,  $3d_{5/2}$ ) energy states from the un-doped CsPbCl<sub>3</sub> and Eu-doped CsPbCl<sub>3</sub> PeNCs.

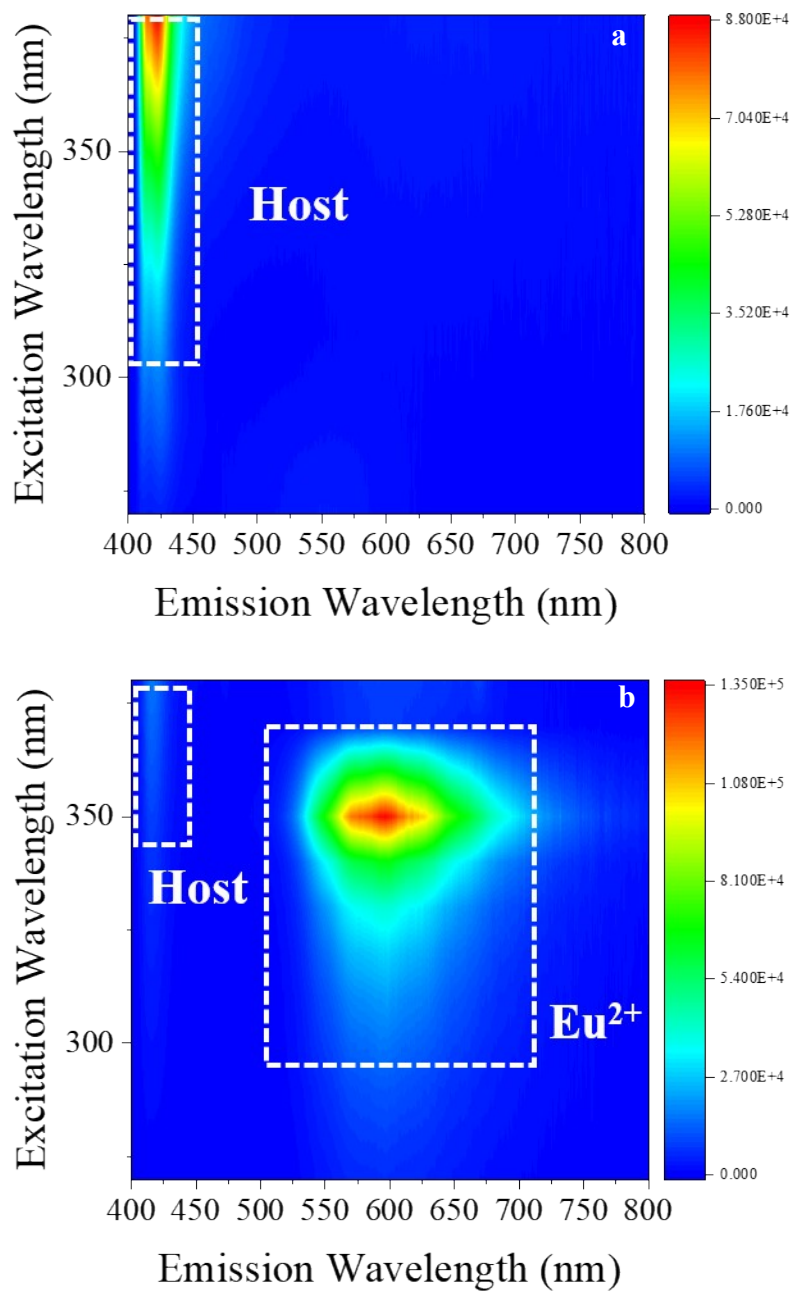

**Figure S5** Two-dimensional excitation-emission mapping for (a) the CsPbCl<sub>3</sub> and (b)

Eu: CsPbCl<sub>3</sub> PeNCs.

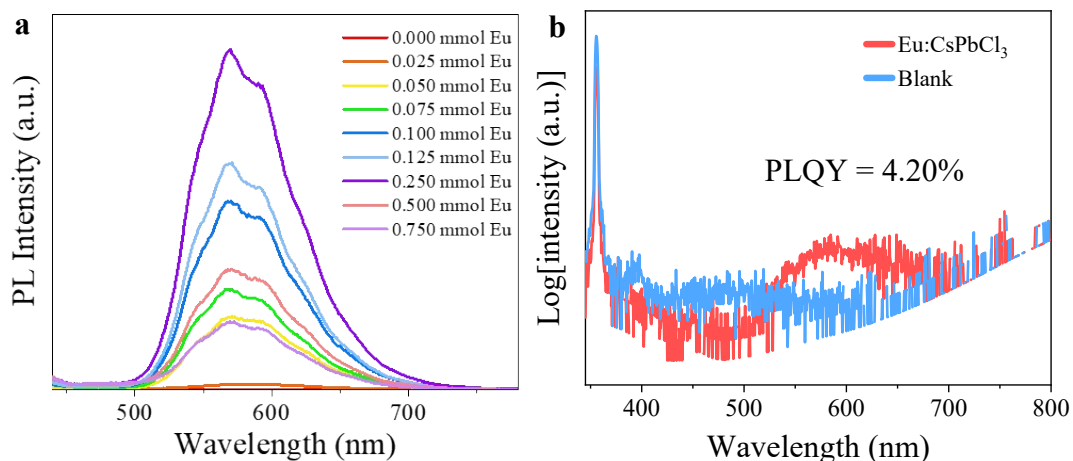

**Figure S6** (a) PL spectra for the broadband  $\text{Eu}^{2+}$  emission of the  $\text{Eu}:\text{CsPbCl}_3$  PeNCs prepared with different amounts of Eu concentrations. (b) PL spectra recorded by a FLS1000 spectrofluorometer equipped with an integrating sphere to determine PLQY.

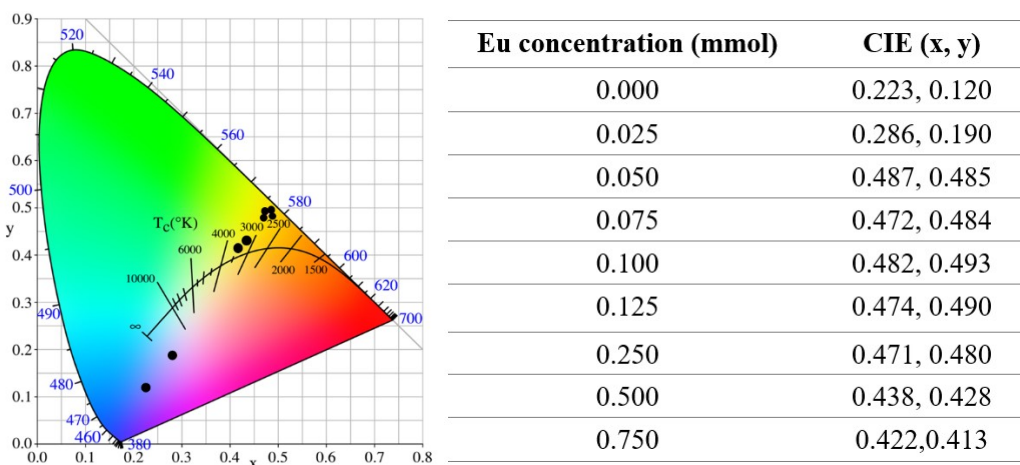

**Figure S7** CIE color coordinates for the  $\text{Eu}:\text{CsPbCl}_3$  samples, showing that the emitting color of the product changes from blue to orange upon increase of Eu doping content.

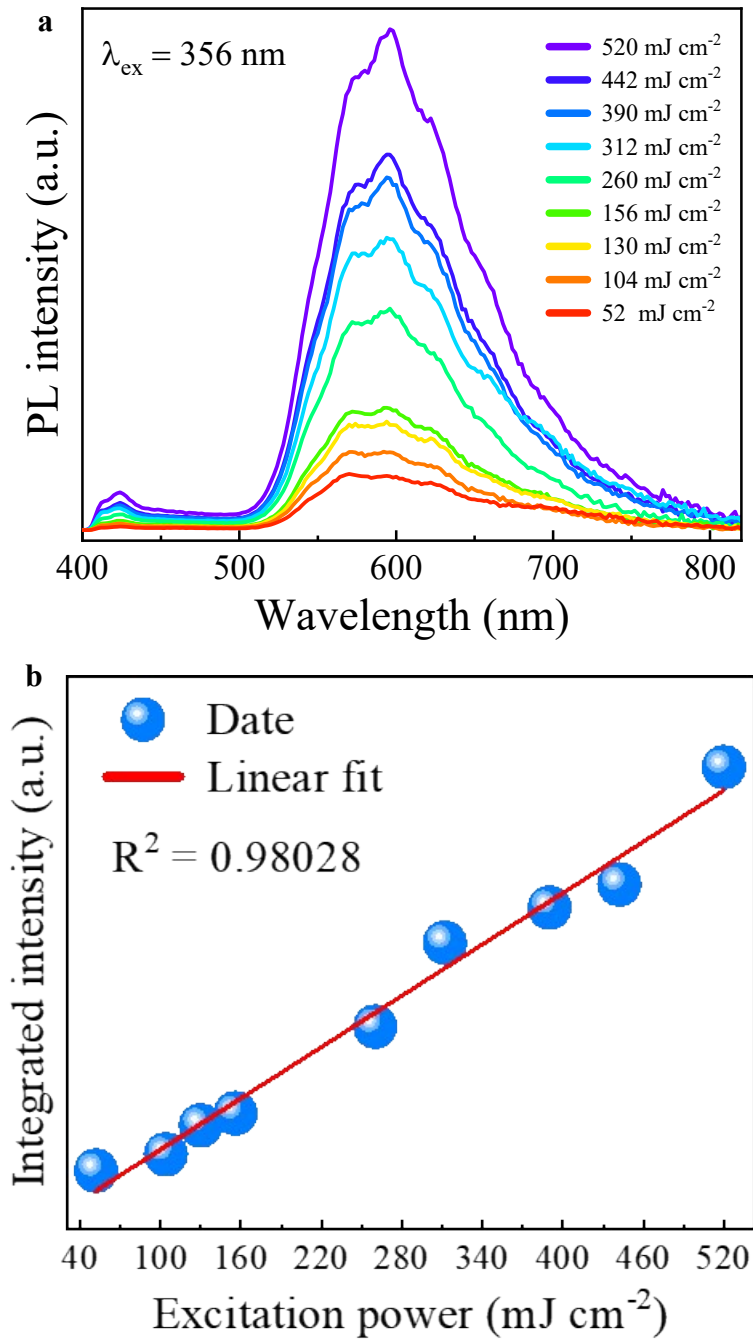

**Figure S8 (a)** Power-dependent PL spectra of the Eu: CsPbCl<sub>3</sub> sample and **(b)** the integrated PL intensity versus excitation power. The red line is a linear fitting.

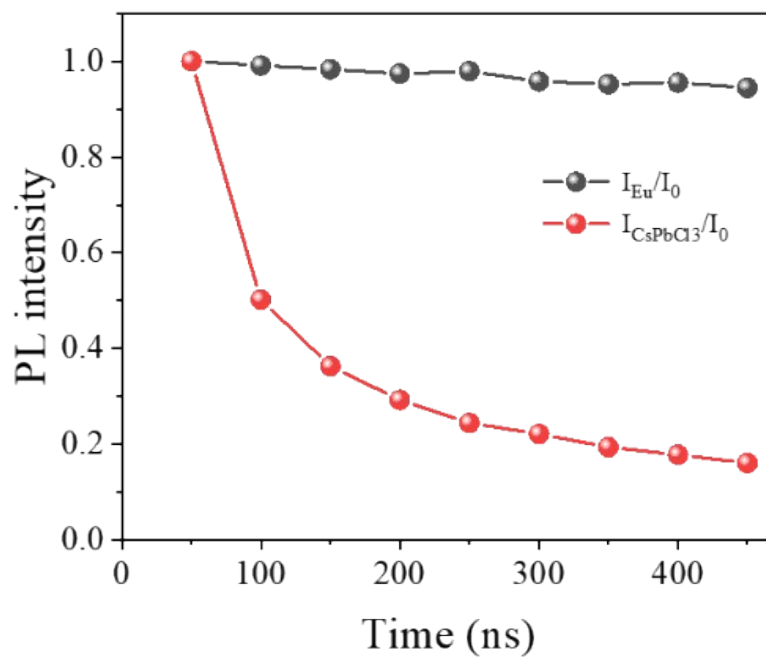

**Figure S9** The variation of PL intensity with the elongation of decay time.

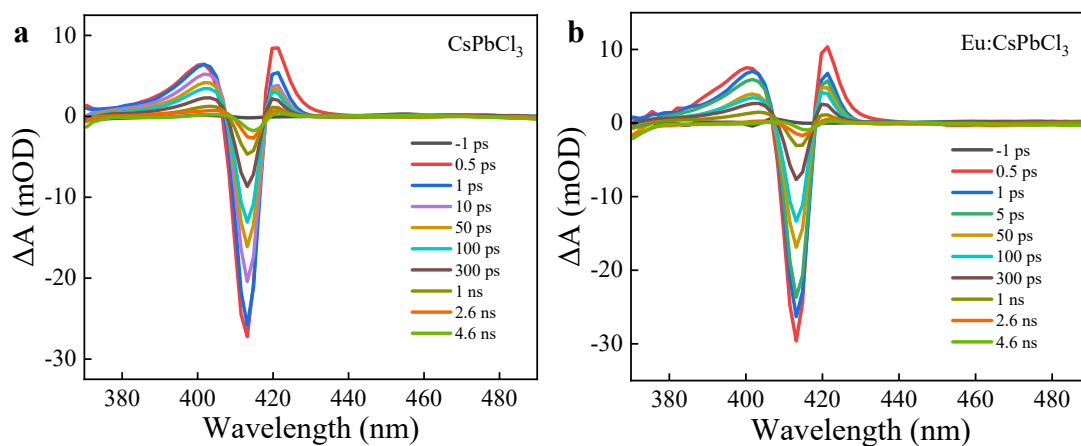

**Figure S10** Pump-probe fs-TA spectra of **(a)** the  $CsPbCl_3$  and **(b)**  $Eu:CsPbCl_3$  PeNCs at different delay times.



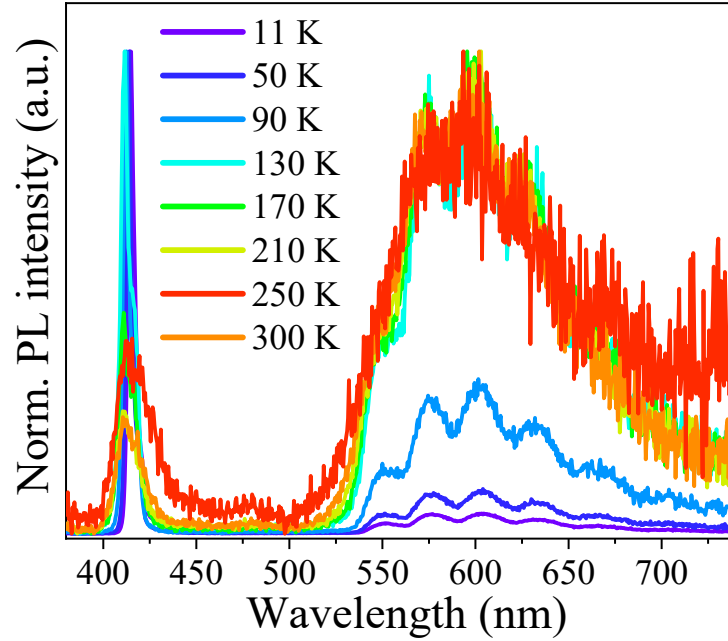

**Figure S11** Normalized temperature-dependent (11~300 K) PL spectra of the Eu:CsPbCl<sub>3</sub> PeNCs.

With elevation of temperature, host PL (i.e. exciton emission) quenches faster than Eu<sup>2+</sup> emission owing to low exciton binding energy, which leads to the observed weak host PL and strong Eu<sup>2+</sup> emission at room temperature.

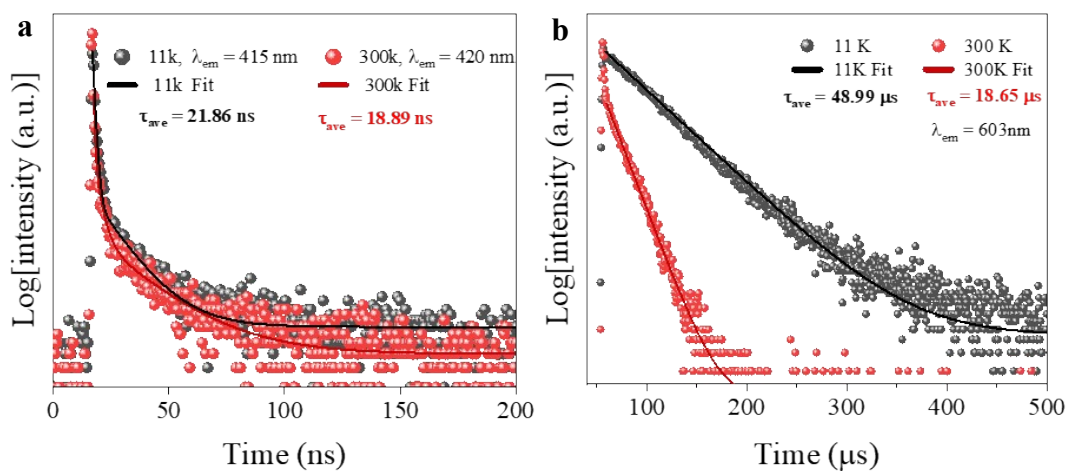

**Figure S12** Temperature-dependent PL decay curves for (a) the CsPbCl<sub>3</sub> and (b) Eu:CsPbCl<sub>3</sub> PeNCs.

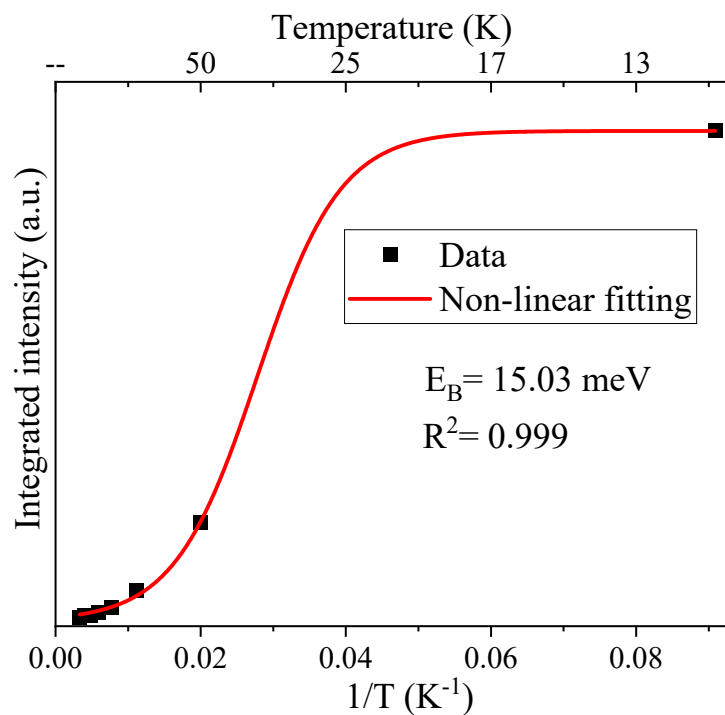

**Figure S13** Integrated PL intensity of exciton recombination for the Eu: CsPbCl<sub>3</sub> sample as a function of temperature, which is used to evaluate exciton binding energy.

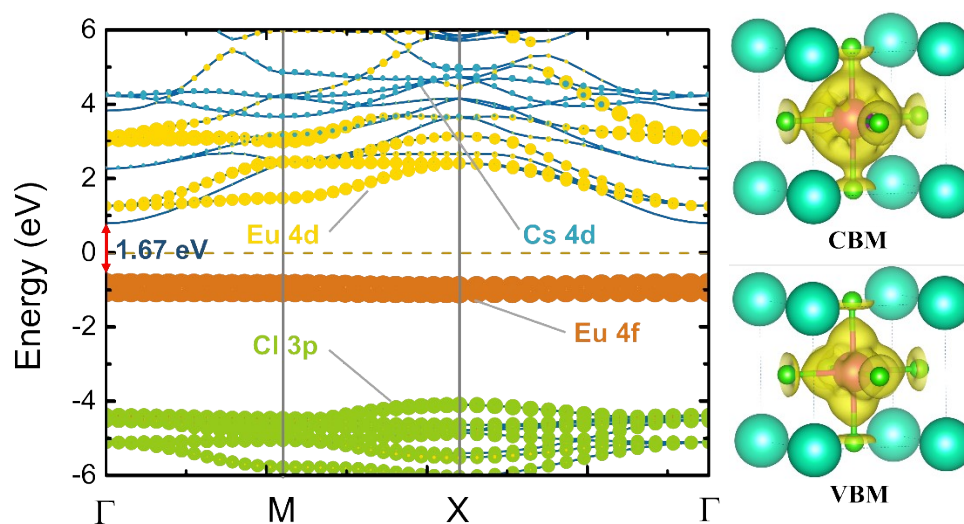

**Figure S14** Orbital projected band structures and VBM/CBM orbital arrangements of CsEuCl<sub>3</sub>. The green, orange, blue, and yellow colors represent the Cl-3p, Eu-4f, Cs-4d and Eu-4d states, respectively.

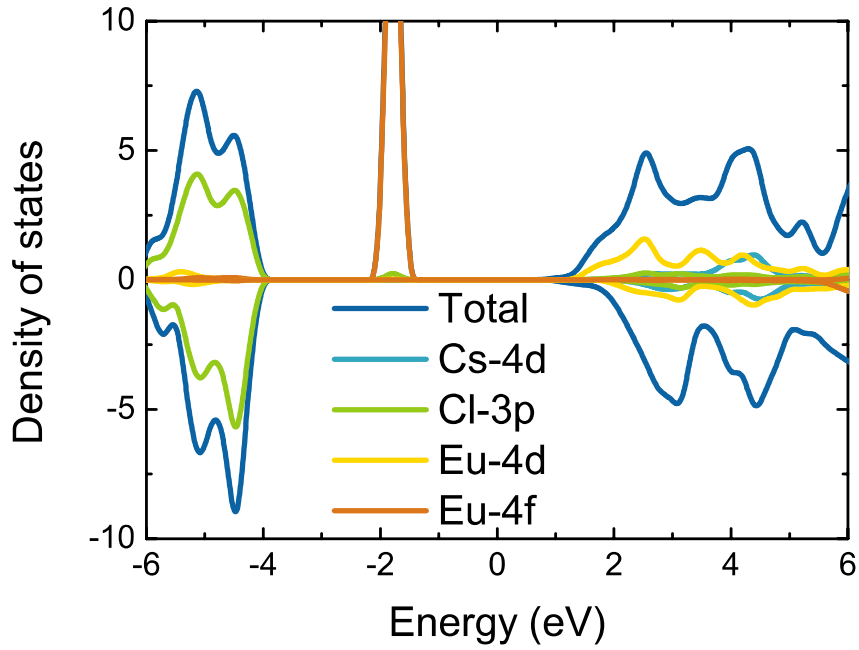

**Figure S15** Projected DOS for CsEuCl<sub>3</sub>.

**Table S1** The calculated values of several key parameters for centroid shift and crystal field splitting of Eu: CsPbCl<sub>3</sub> PeNCs.

| Parameter                                          | Value |
|----------------------------------------------------|-------|
| R(Eu <sup>2+</sup> ) (ppm)                         | 117   |
| R(Pb <sup>2+</sup> ) (ppm)                         | 118   |
| R(Eu-Cl) (ppm)                                     | 286   |
| R(Eu-O) (ppm)                                      | 240   |
| $\chi_{\text{Cs}}$                                 | 0.79  |
| $\chi_{\text{Pb}}$                                 | 2.33  |
| $\chi_{\text{av}}$                                 | 1.82  |
| $\alpha_{\text{Cl sp}}$ ( $10^{-30} \text{ m}^3$ ) | 2.46  |
| $\alpha_{\text{o sp}}$ ( $10^{-30} \text{ m}^3$ )  | 1.78  |
| $\epsilon_{\text{c}}$ (eV)                         | 0.75  |
| $\epsilon_{\text{cfs}}$ (eV)                       | 0.81  |
| D (eV)                                             | 1.16  |
| $E_{\text{x}}$ (eV)                                | 3.06  |
| $E_{\text{m}}$ (eV)                                | 2.22  |
